# Supplementary material for: Structure of the endosomal Commander complex linked to Ritscher-Schinzel syndrome
Source: PubMed Central journal article supplement (PMC10187114; doi:10.1016/j.cell.2023.04.003), 2023-05-11

**Data S1. Quantified band intensities from all western blots in this study. Page 1/1**

Band intensities were quantified using Odyssey software and normalized to GFP expression. 2-way ANOVA with Dunnett's multiple comparisons test. Error bars represent the mean, s.d.

\*P < 0.05, \*\*P < 0.01, \*\*\*P < 0.001, \*\*\*\*P < 0.0001.

**Figure 1 blot quantification**

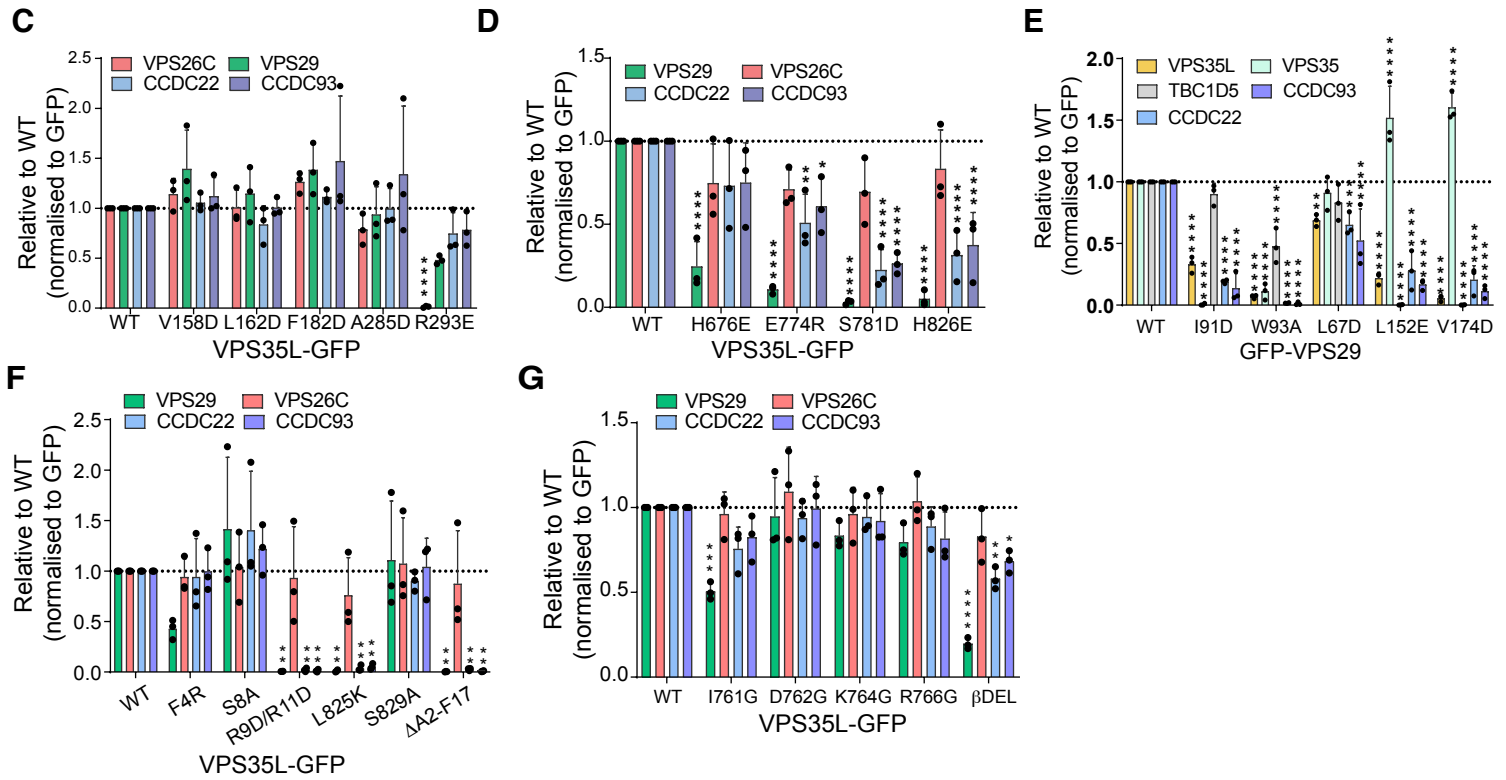

**Figure 2 blot quantification**

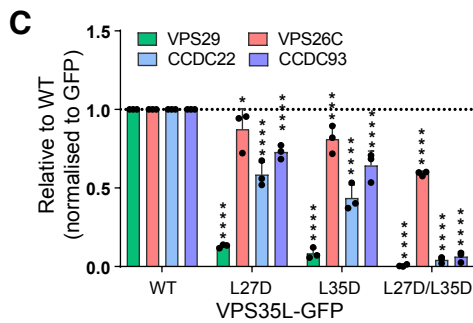

**Figure 5 blot quantification**

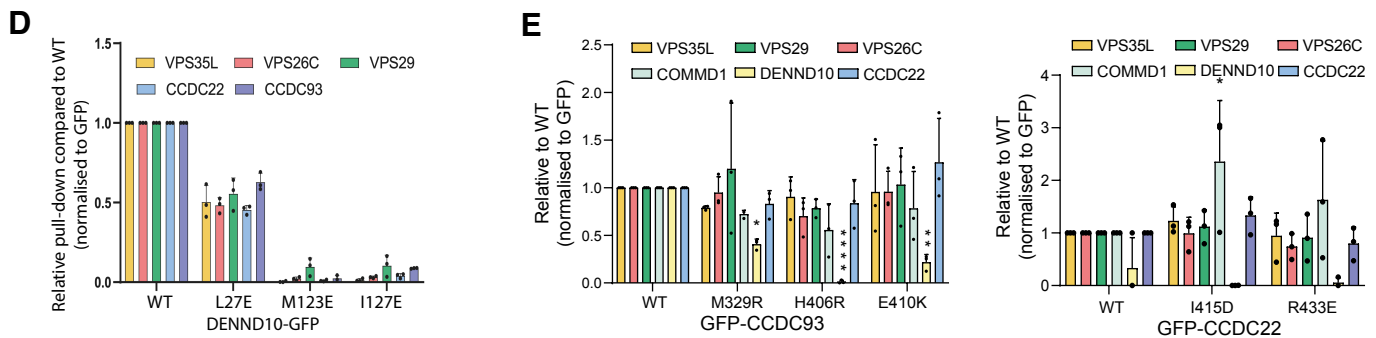

**Figure 6 blot quantification**

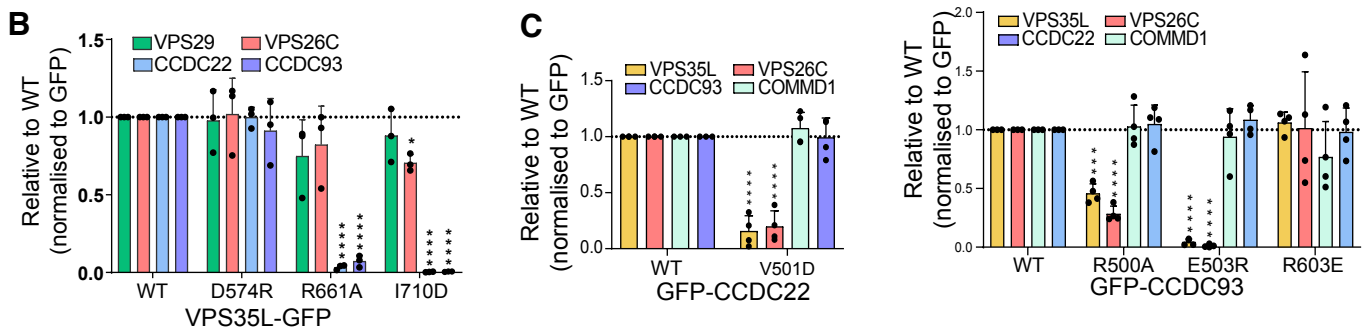

Raw data for Fig1C:

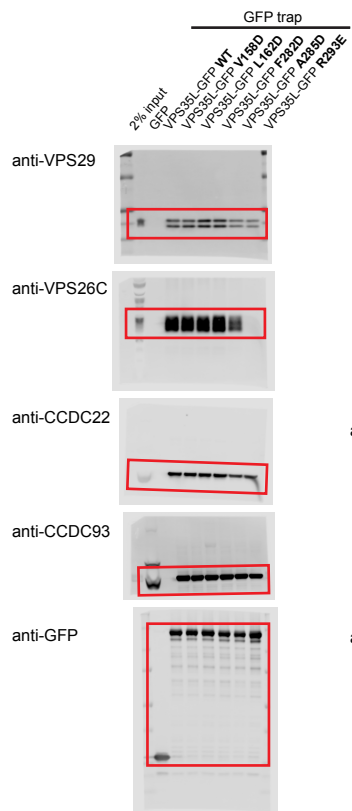

Raw data for Fig1D:

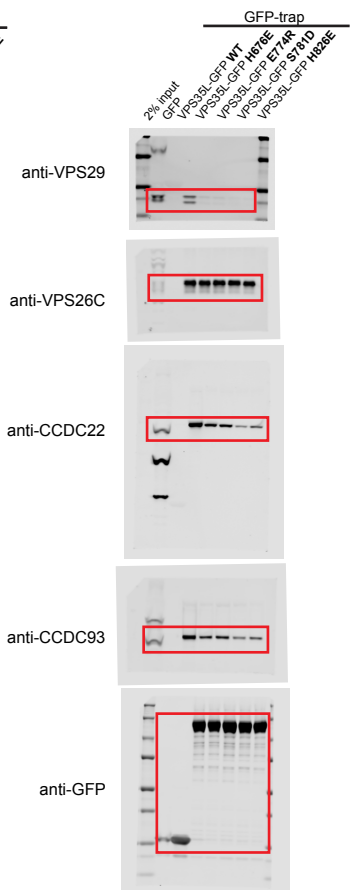

Raw data for Fig1E:

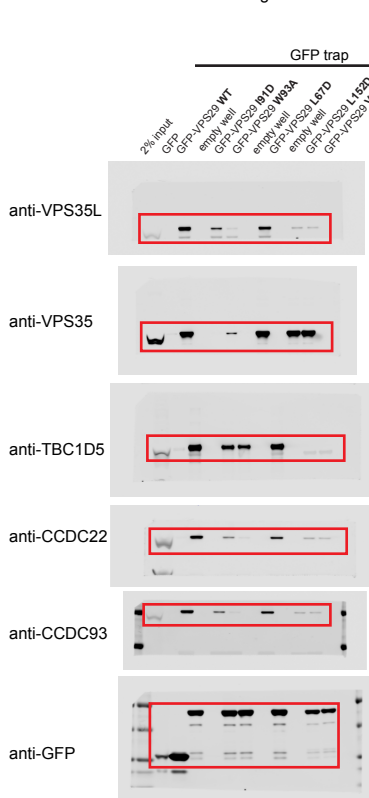

Raw data for Fig1F:

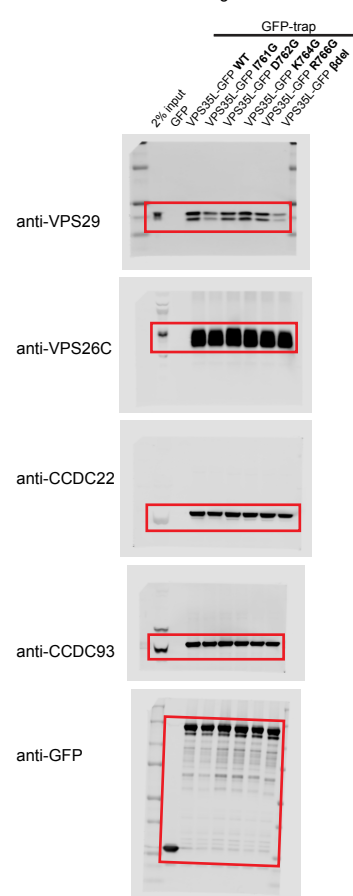

Raw data for Fig1G:

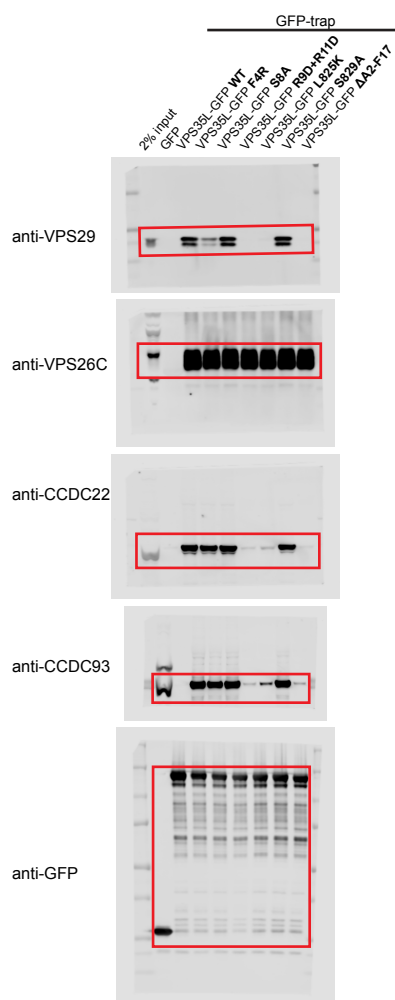

Raw data for Fig2C:

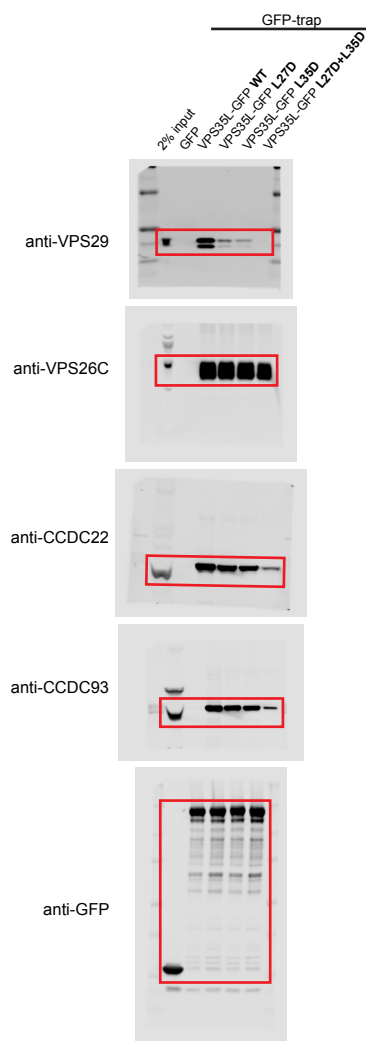

Raw data for Fig2E:

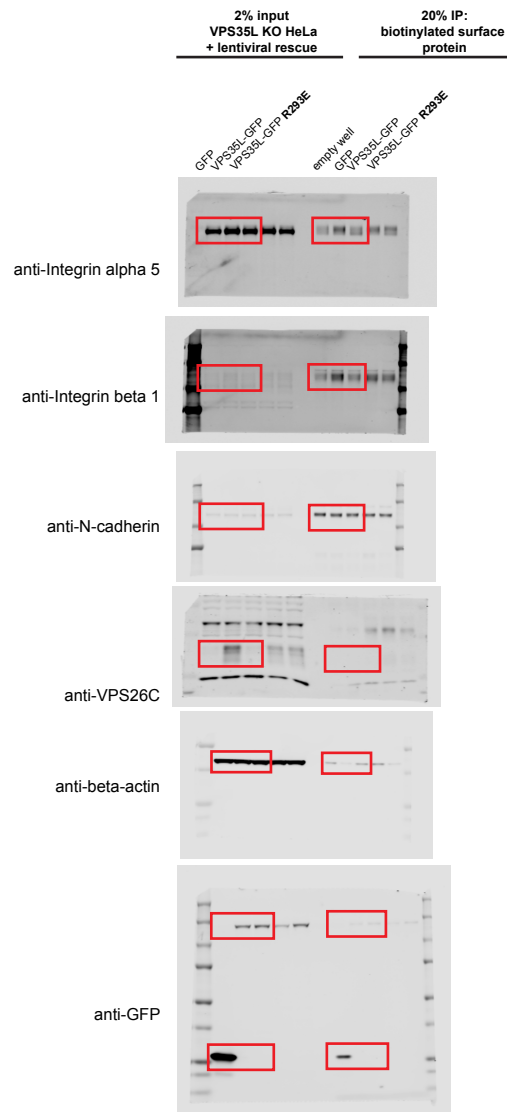



# Raw images of gels and western blots included in this study. Page 2/3

Raw data for Fig5B:

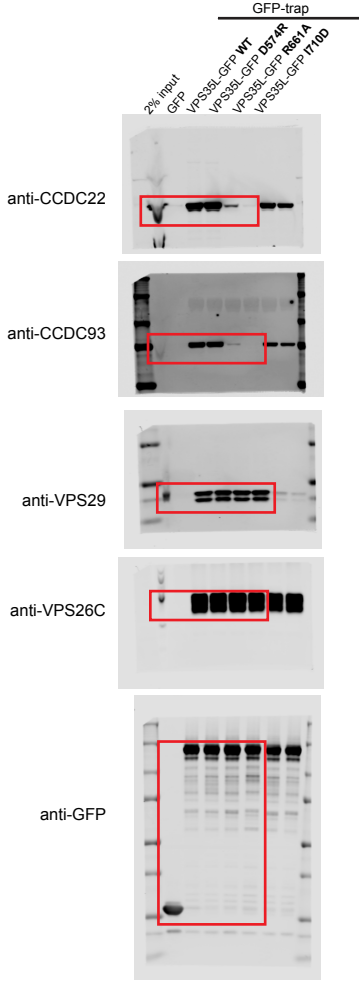

Raw data for Fig5C:

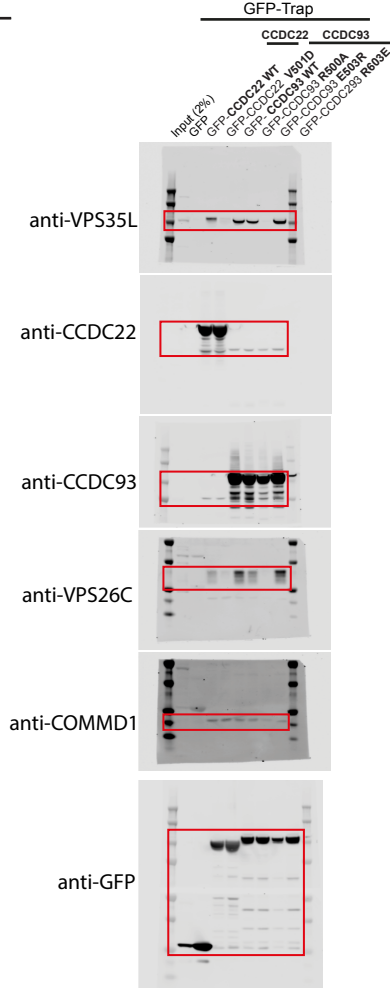

Raw data for FigS2C:

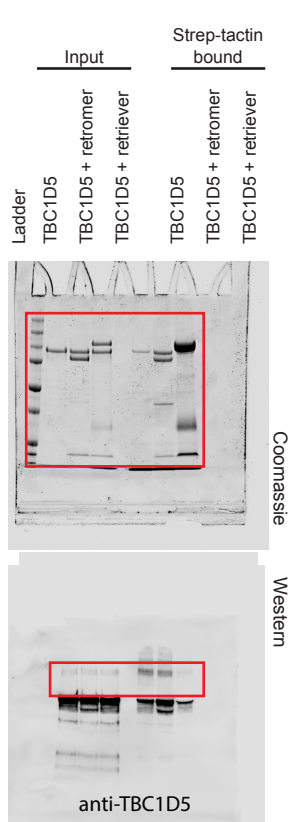

Raw data for FigS2D:

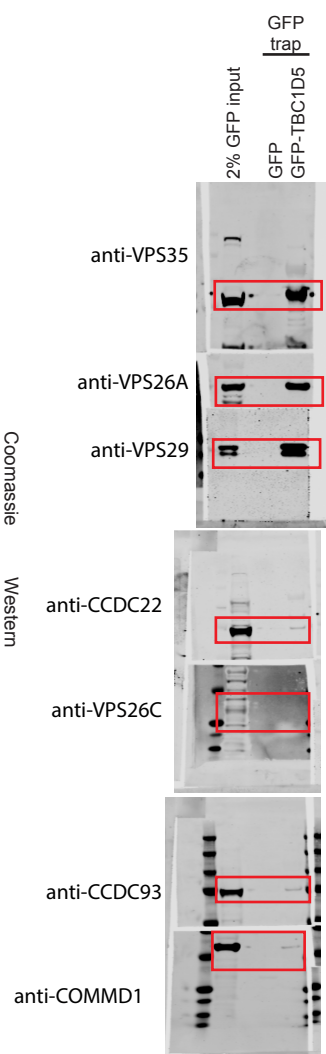

Raw data for FigS1B:

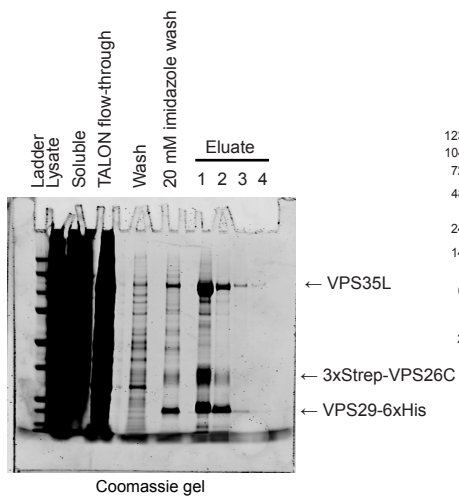

Raw data for FigS1D:

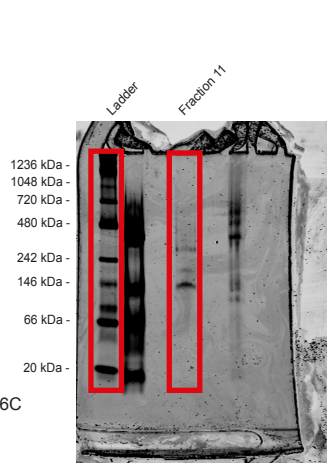

Raw data for FigS2E:

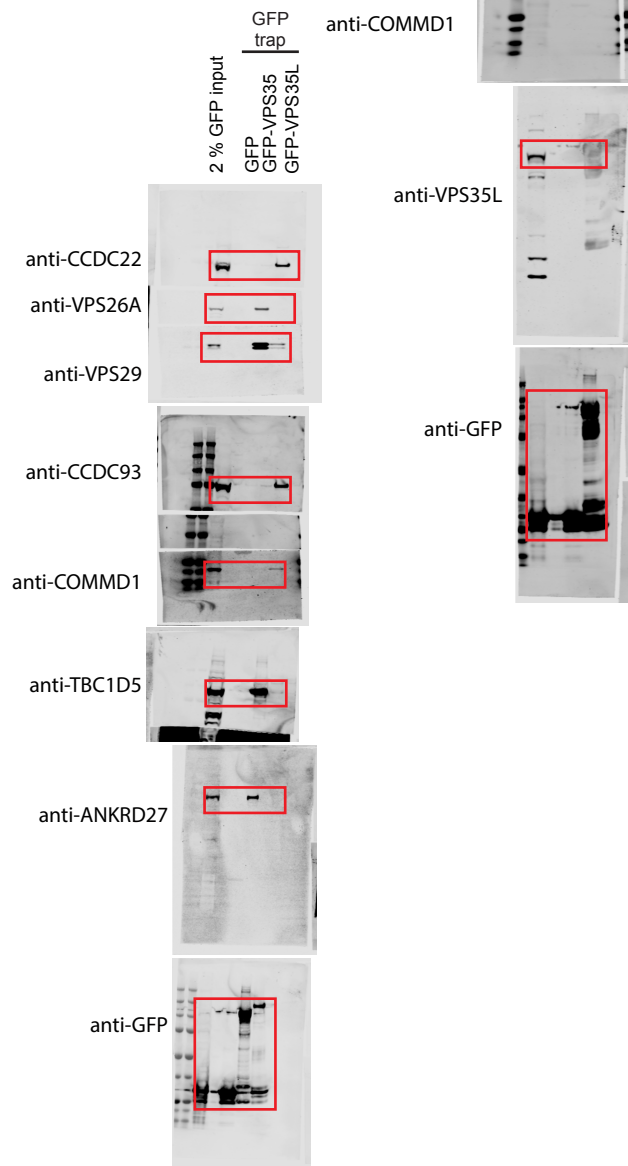

Raw data for FigS1C:

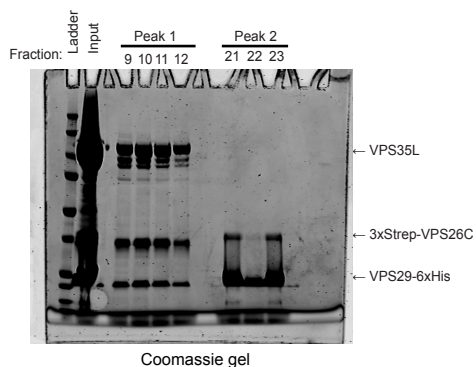

Raw data for FigS2H:

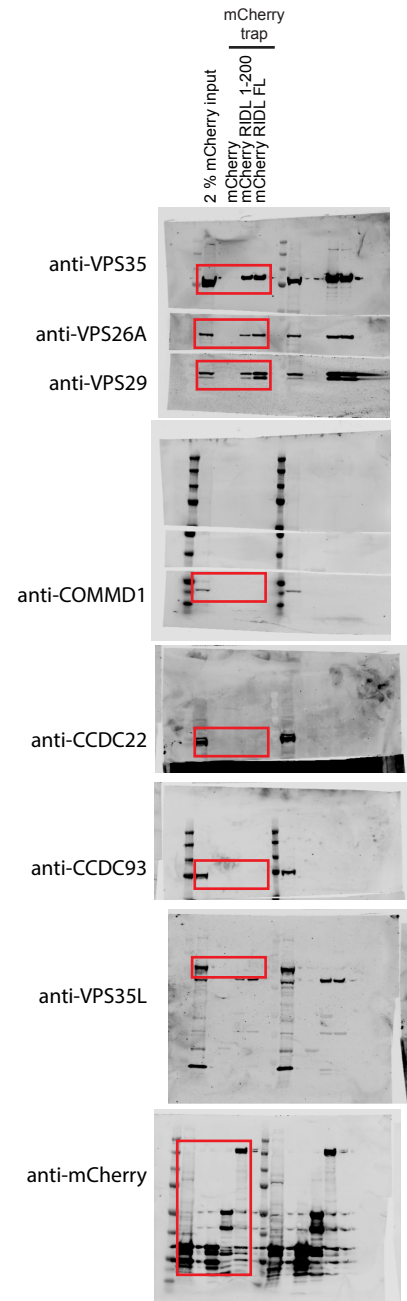

Raw data for FigS4B:

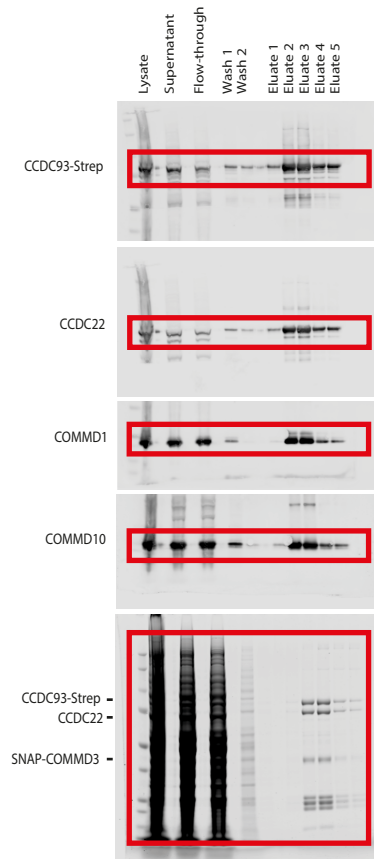

Raw data for Fig4B:

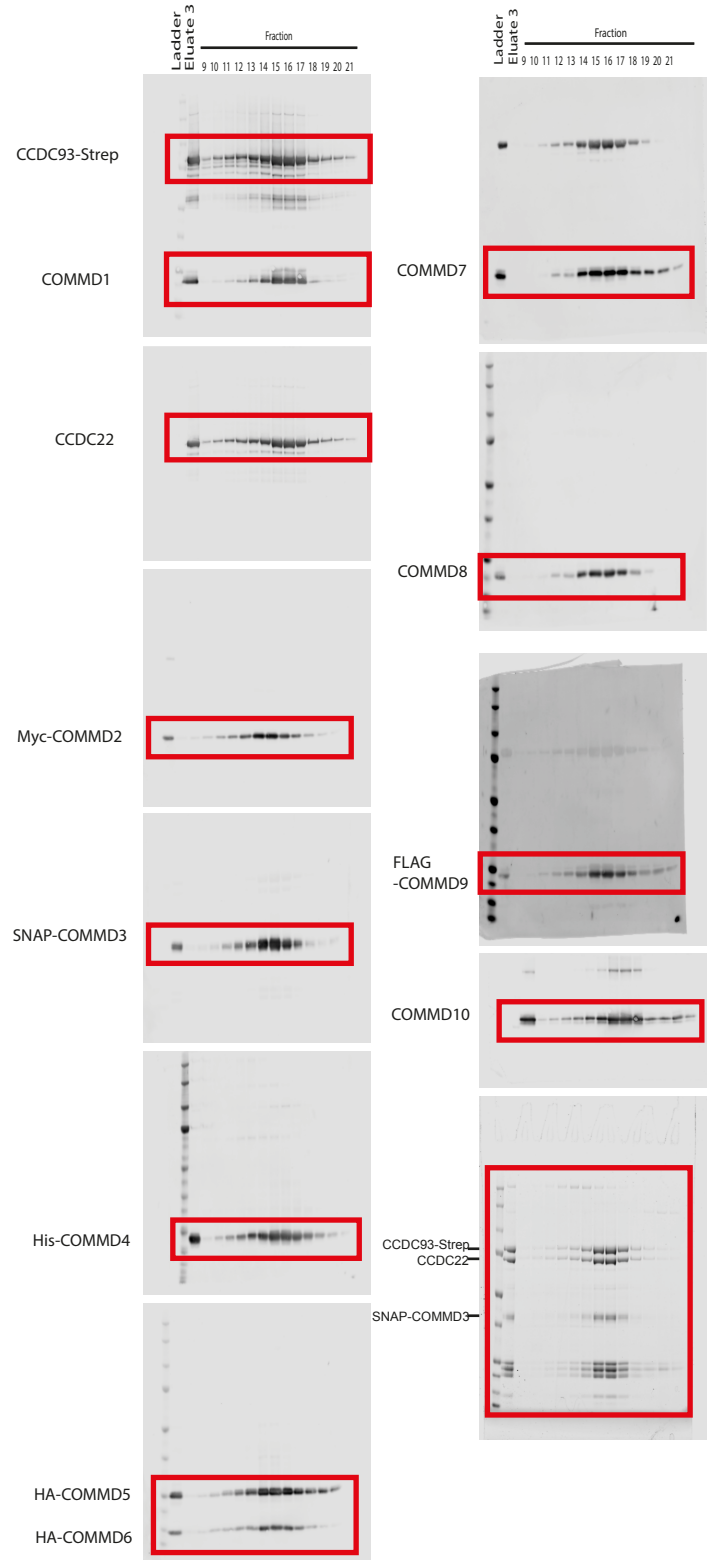

Raw data for FigS3C:

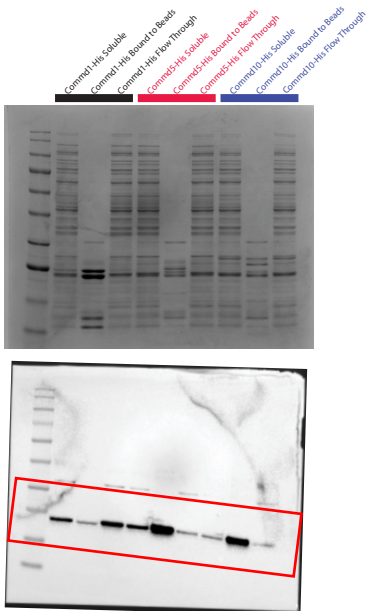

Raw data for FigS4D:

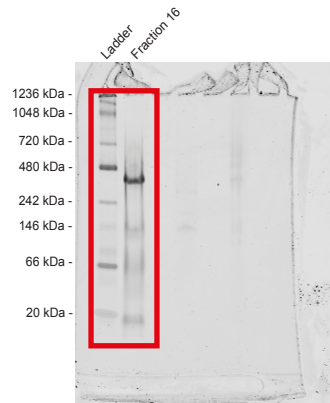

Raw data for FigS11C:

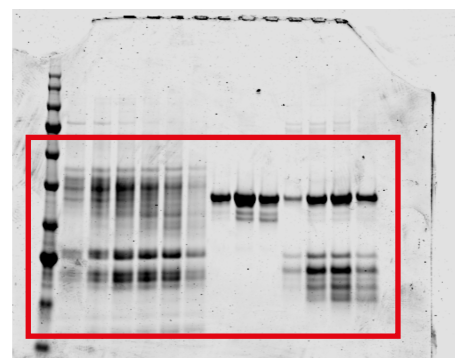

Supplement: mmc4.pdf [file mmc4.pdf]
