# Supplementary material for: Structure of the endosomal Commander complex linked to Ritscher-Schinzel syndrome
Source: PubMed Central journal article supplement (PMC10187114; doi:10.1016/j.cell.2023.04.003), 2023-05-11
Supplement: mmc1.pdf [file mmc1.pdf]

## **Supplemental information**

### **Structure of the endosomal Commander complex linked to Ritscher-Schinzel syndrome**

**Michael D. Healy, Kerrie E. McNally, Rebeka Butkovič, Molly Chilton, Kohji Kato, Joanna Sacharz, Calum McConville, Edmund R.R. Moody, Shrestha Shaw, Vicente J. Planelles-Herrero, Sathish K.N. Yadav, Jennifer Ross, Ufuk Borucu, Catherine S. Palmer, Kai-En Chen, Tristan I. Croll, Ryan J. Hall, Nikeisha J. Caruana, Rajesh Ghai, Thi H.D. Nguyen, Kate J. Heesom, Shinji Saitoh, Imre Berger, Christiane Schaffitzel, Tom A. Williams, David A. Stroud, Emmanuel Derivery, Brett M. Collins, and Peter J. Cullen**

**Table S1. Cryo-EM data collection, refinement, and validation statistics. Related to Figures 1 and 4.**

|                                                                          | <b>Retriever</b><br>VPS35L-VPS26C-VPS29                       | <b>CCC</b><br>COMMD1 to COMMD10-CCDC22-<br>CCDC93                          |                     |
|--------------------------------------------------------------------------|---------------------------------------------------------------|----------------------------------------------------------------------------|---------------------|
| <b>Data collection and processing</b>                                    |                                                               |                                                                            |                     |
| Magnification                                                            | 130,000                                                       | 75,000                                                                     |                     |
| Voltage (kV)                                                             | 200                                                           | 300                                                                        |                     |
| Electron exposure ( $e^-/\text{\AA}^2$ ) Defocus range ( $\mu\text{m}$ ) | 61.7 $e^-/\text{\AA}^2$<br>-2, -1.6, -1.2, -0.8 $\mu\text{m}$ | 43.55/42.73 $e^-/\text{\AA}^2$<br>-2, -1.8, -1.6, -1.4, -1.2 $\mu\text{m}$ |                     |
| Pixel size ( $\text{\AA}$ )                                              | 0.525                                                         | 1.084                                                                      |                     |
| Symmetry imposed                                                         | C1                                                            | C1                                                                         |                     |
| Programme used                                                           | RELION/cryoSPARC                                              | cryoSPARC                                                                  | RELION              |
| Initial particle images (no.)                                            | 297,077                                                       | 2,666,858                                                                  | 1,321,587           |
| Final particle images (no.)                                              | 119,564                                                       | 153,104                                                                    | 20,034              |
| Map resolution ( $\text{\AA}$ )                                          | 4.3 <sup>a</sup>                                              | 3.12                                                                       | 3.53                |
| FSC threshold                                                            | 0.143                                                         | 0.143                                                                      | 0.143               |
|                                                                          |                                                               |                                                                            |                     |
| <b>Refinement</b>                                                        |                                                               |                                                                            |                     |
| Initial model used                                                       |                                                               | Colabfold                                                                  | CryoSPARC/Colabfold |
| Model resolution range ( $\text{\AA}$ )                                  |                                                               | 3.49                                                                       | 3.98                |
| FSC threshold                                                            |                                                               | 0.5                                                                        | 0.5                 |
| Map sharpening <i>B</i> factor ( $\text{\AA}^2$ )                        |                                                               | 83                                                                         | - 24                |
| Model composition                                                        |                                                               |                                                                            |                     |
| Non-hydrogen atoms                                                       |                                                               | 29276                                                                      | 36574               |
| Protein residues                                                         |                                                               | 1837                                                                       | 2298                |
| R.m.s. deviations                                                        |                                                               |                                                                            |                     |
| Bond lengths ( $\text{\AA}$ )                                            |                                                               | 0.005                                                                      | 0.002               |

|                   |  |           |                                    |
|-------------------|--|-----------|------------------------------------|
| Bond angles (°)   |  | 1.118     | 0.561                              |
| Validation        |  |           |                                    |
| MolProbity score  |  | 1.41      | 1.49                               |
| Clashscore        |  | 6.01      | 6.24 (90 <sup>th</sup> percentile) |
| Poor rotamers (%) |  | 0.12      | 0                                  |
| Ramachandran plot |  |           |                                    |
| Favored (%)       |  | 97.63     | 97.18                              |
| Outliers (%)      |  | 0.17      | 0                                  |
| EMDB ID           |  | EMD-28825 | EMD-28827                          |
| PDB ID            |  | 8F2R      | 8F2U                               |

a. This is significantly overestimated due to preferred particle orientations.
