# Supplementary material for: Structure of the endosomal Commander complex linked to Ritscher-Schinzel syndrome
Source: PubMed Central journal article supplement (PMC10187114; doi:10.1016/j.cell.2023.04.003), 2023-05-11
Supplement: mmc2.pdf [file mmc2.pdf]

**Table S2. Crystal structure data collection, refinement and validation statistics<sup>a</sup>.  
Related to Figures 2 and 3.**

|                                                | <b>COMMD5-COMMD7-COMMD9-COMMD10</b> | <b>VPS29-VPS35L peptide</b> |
|------------------------------------------------|-------------------------------------|-----------------------------|
| <b>Data Collection</b>                         |                                     |                             |
| Space group                                    | C2                                  | P212121                     |
| Unit cell dimensions (a,b,c) (Å)               | 215.19 74.89 63.63                  | 43.72 55.28 82.64           |
| Unit cell angles ( $\alpha,\beta,\gamma$ ) (°) | 90.00 96.40 90.00                   | 90.00 90.00 90.00           |
| Wavelength (Å)                                 | 0.95372                             | 0.95365                     |
| Resolution range (Å)                           | 48.02-3.33 (3.60-3.33)              | 45.95-1.35 (1.37-1.35)      |
| Total reflections                              | 102614 (20743)                      | 277842 (11606)              |
| Unique reflections                             | 14773 (2987)                        | 44459 (1992)                |
| Multiplicity                                   | 6.9 (6.9)                           | 6.2 (5.8)                   |
| Completeness (%)                               | 99.0 (97.6)                         | 99.1 (91.6)                 |
| Mean I/ $\sigma$ (I)                           | 8.9 (1.3)                           | 11.3 (1.0)                  |
| R-merge                                        | 0.108 (1.088)                       | 0.07 (1.47)                 |
| R-meas                                         | 0.127 (1.278)                       | 0.077 (1.61)                |
| R-pim                                          | 0.048 (0.480)                       | 0.031 (0.643)               |
| CC(1/2)                                        | 0.999 (0.732)                       | 0.998 (0.481)               |
|                                                |                                     |                             |
| <b>Refinement</b>                              |                                     |                             |
| R-work                                         | 0.243 (0.318)                       | 0.219 (0.400)               |
| R-free                                         | 0.287 (0.404)                       | 0.246 (0.382)               |
| Number of non-hydrogen atoms                   | 4157                                | 1770                        |
| Number macromolecule atoms                     | 4157                                | 1576                        |
| Number water atoms                             | 0                                   | 194                         |
| RMS bonds (Å)                                  | 0.002                               | 0.023                       |
| RMS angles (°)                                 | 0.519                               | 1.95                        |
| Ramachandran favored (%)                       | 96.5                                | 97.9                        |
| Ramachandran allowed (%)                       | 3.5                                 | 2.1                         |
| Ramachandran outliers (%)                      | 0                                   | 0                           |
| Clashscore                                     | 2.97                                | 9.8                         |
| Overall Molprobit score                        | 1.11                                | 1.7                         |
| Average B-factor                               | 141.4                               | 26.7                        |
| PDB ID                                         | 8ESD                                | 8ESE                        |

a. Statistics for the highest-resolution shell are shown in parentheses.
