# Supplementary material for: Structure of the endosomal Commander complex linked to Ritscher-Schinzel syndrome
Source: PubMed Central journal article supplement (PMC10187114; doi:10.1016/j.cell.2023.04.003), 2023-05-11
Supplement: mmc3.pdf [file mmc3.pdf]

## gRNA sequences for HeLa KO

| Gene   | Exon | gRNA sequence            |
|--------|------|--------------------------|
| VPS29  | 2    | GGCAAAGTGTTCACCGG<br>TG  |
|        | 3    | GGACATCAAGTTATTCCAT<br>G |
| VPS35L | 1    | GCAGACGCCATGCTTGTG<br>AG |

## gRNA sequences for eHAP KO

| Gene        | UniprotID | gRNA (PAM)                      | KO verified by SDS-PAGE  | Sequencing primers                                                           | Mutation                         | Protein impact |
|-------------|-----------|---------------------------------|--------------------------|------------------------------------------------------------------------------|----------------------------------|----------------|
| COMMD1      | Q8N668    | CGCTGGAATAG                     | Yes                      | CGGGGATCCTCTTGACTGCTCAAAC<br>CAAAAA /<br>GACAAGCTTTATTGCCCCATTCTGTT<br>CTTCT | c.[356_363del]                   | p.L119Pfs*7    |
| COMMD2      | Q86X83    | GCGGCGCCTTC                     | Yes                      | CGGGGATCCTTCTGACTTTCATTGCA<br>GTGGT /<br>GACAAGCTTCTTGCAATTTACAGTTG<br>ACCCA | c.[127_129insAA]                 | p.I43Kfs*43    |
| COMMD3      | Q9UBI1    | GCCGAGCGGCT                     | Yes                      | CGGGGATCCCTTCGACTCCAACGCC<br>TTC /<br>GACAAGCTTAACAATGCTCAGAGTCT<br>GCTCC    | c.[138_139insTA]                 | p.D47Ter       |
| COMMD4      | Q9H0A8    | AGCGGGATACT                     | Yes                      | NA                                                                           | NA                               | NA             |
| COMMD5      | Q9GZQ3    | AGCAATGGCCC                     | Yes                      | NA                                                                           | NA                               | NA             |
| COMMD6      | Q7Z4G1    | CGTTGCAGTGA<br>TGCTAAAAGIG<br>G | No antibody<br>available | CGGGGATCCAAGGAAACCAATACTG<br>CCACAT /<br>GACAAGCTTAAACCTGAAACTGTGGA<br>ATCGT | c.[143_144ins(200<br>)]          | p.K48Nfs*91    |
| COMMD7      | Q86VX2    | ACCCTTGCTCG                     | Yes                      | NA                                                                           | NA                               | NA             |
| COMMD8      | Q9NX08    | TACCTTATTCGC                    | Yes                      | CGGGGATCCTTTAAACAGCTTGCACT<br>TTCCA /<br>GACAAGCTTAGGTCAAGAGTTTGAGA<br>CCAGC | c.[514_531+102del]               | p.L172Ter      |
| COMMD9      | Q9P000    | CACGCCTGGT<br>CGATCTGGACI<br>GG | No antibody<br>available | CGGGGATCCGATACGCTGCCACTGT<br>GAATTA /<br>GACAAGCTTAAGGAGGATAAAGGGGA<br>TGGTA | c.[368_376delins(<br>124);G379A] | p.V124Pfs*19   |
| COMMD<br>10 | Q9Y6G5    | AGAATCCGAGTC                    | Yes                      | NA                                                                           | NA                               | NA             |

## AlphaFold2 predicted complexes

<https://www.modelarchive.org>

| Model number | Species                     | Proteins                                                                       | ModelArchive ID |
|--------------|-----------------------------|--------------------------------------------------------------------------------|-----------------|
| 1            | <i>Homo sapiens</i>         | COMMD1-10 + CCDC22 (1-223) + CCDC93 (1-300)                                    | ma-iplv4        |
| 2            | <i>Homo sapiens</i>         | CCDC22 + CCDC93                                                                | ma-9nv72        |
| 3            | <i>Homo sapiens</i>         | VPS35L+ VPS26C + VPS29                                                         | ma-3cag5        |
| 4            | <i>Homo sapiens</i>         | VPS35L + VPS26C + VPS29 + CCDC22 (1-115) + CCDC22 (386-627) + CCDC93 (378-631) | ma-4097m        |
| 5            | <i>Homo sapiens</i>         | Combined models 1 + 2 + 3                                                      | ma-ri7tb        |
| 6            | <i>Danio rerio</i>          | COMMD1-10                                                                      | ma-99f82        |
| 7            | <i>Salpingoecia rosetta</i> | COMMD1-10                                                                      | ma-xfc84        |
